# Supplementary material for: 9p21 Locus Polymorphism Is A Strong Predictor of Metabolic Syndrome and Cardiometabolic Risk Phenotypes Regardless of Coronary Heart Disease
Source: MDPI journal article supplement (doi:10.3390/genes13122226), 2022-11-27
Supplement: s1 [file s1]

## Supplementary Material

# 9p21 Locus Polymorphism is A Strong Predictor of Metabolic Syndrome and Cardiometabolic Risk Phenotypes Regardless of Coronary Heart Disease

Muhammad Mobeen Zafar <sup>1</sup>, Muhammad Saqlain <sup>2</sup>, Asad Mehmood Raja <sup>1</sup>, Pakeeza Arzoo Shaiq <sup>1</sup>, Muhammad Javaid Asad <sup>1</sup>, Muhammad Kausar Nawaz Shah <sup>3</sup>, Farah Fatima <sup>4</sup>, Hadi Valadi <sup>5</sup> Muhammad Nawaz <sup>5,\*</sup>, Ghazala Kaukab Raja <sup>1,\*</sup>

<sup>1</sup> University Institute of Biochemistry & Biotechnology, PMAS- Arid Agriculture University Rawalpindi, 46300, Pakistan

<sup>2</sup> Department of Biochemistry and Molecular Biology, University of Sialkot, Sialkot, 51040, Pakistan

<sup>3</sup> Department of Plant Breeding and Genetics, PMAS- Arid Agriculture University Rawalpindi, 46300, Pakistan

<sup>4</sup> Department of Pathology, Ribeirao Preto Medical School, University of Sao Paulo, Ribeirao Preto, 3900, Brazil

<sup>5</sup> Department of Rheumatology and Inflammation Research, Institute of Medicine, Sahlgrenska Academy, University of Gothenburg, Gothenburg, 41346, Sweden

\* Correspondence: Muhammad Nawaz (muhammad.nawaz@gu.se), Ghazala Kaukab Raja (ghazala@uaar.edu.pk)

Citation: Mobeen Zafar, M.; Saqlain, M.; Mehmood Raja, A.; Arzoo Shaiq, P.; Javaid Asad, M.; Nawaz Shah, M.K.; Fatima, F.; Valadi, H.; Nawaz, M.; Raja, G.K. 9p21 Locus Polymorphism Is A Strong Predictor of Metabolic Syndrome and Cardiometabolic Risk Phenotypes Regardless of Coronary Heart Disease. *Genes* **2022**, *13*, 2226.

<https://doi.org/10.3390/genes13122226>

Academic Editor: Zsolt Ronai

Received: 3 November 2022

Accepted: 23 November 2022

Published: 27 November 2022

**Publisher's Note:** MDPI stays neutral with regard to jurisdictional claims in published maps and institutional affiliations.

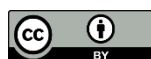

**Copyright:** © 2022 by the authors. Submitted for possible open access publication under the terms and conditions of the Creative Commons Attribution (CC BY) license (<https://creativecommons.org/licenses/by/4.0/>).

## Supplementary table for Figures 3 and 4

**Table S1: Comparison of study variables in rs1333049 SNP minor/risk (C) allele and major (G) allele carriers and SD change from population means in C allele carriers**

| Study Variables | Non-Carrier<br>(GG) | C Allele Carrier<br>(GC + CC) | SD change from<br>population<br>means in C allele<br>Carrier | P-value  |
|-----------------|---------------------|-------------------------------|--------------------------------------------------------------|----------|
| Age (Years)     | 40.8                | 46.3                          | 2.3                                                          | 1.36E-04 |
| Weight (Kg)     | 70.5                | 72.3                          | 0.1                                                          | 3.38E-04 |
| SBP (mm/Hg)     | 126.2               | 128.4                         | -8.4                                                         | 2.57E-02 |
| DBP (mm/Hg)     | 82.1                | 84.6                          | 2.2                                                          | 1.10E-04 |
| FBG (mg/dl)     | 95.9                | 102.4                         | 2.1                                                          | 3.48E-04 |
| TG (mg/dl)      | 157                 | 174.3                         | 2.2                                                          | 3.82E-02 |
| TC (mg/dl)      | 193.9               | 215.6                         | -2.6                                                         | 2.00E-04 |
| HDL (mg/dl)     | 48.2                | 43.9                          | -1.7                                                         | 4.55E-03 |
| LDL (mg/dl)     | 112.1               | 126.4                         | 1                                                            | 4.70E-05 |

SBP; systolic blood pressure, DBP; diastolic blood pressure, FBG; fasting blood glucose, TG; triglycerides, TC; total cholesterol, HDL; high-density lipoprotein, LDL; low density lipoprotein.

## Supplementary table for Figures 5 and 6

**Table S2: Comparison of adiposity traits in rs1333049 SNP minor/risk (C) allele and major (G) allele carriers and SD change from population means in C allele carriers**

| Adiposity<br>Indices     | Non-Carrier<br>(GG) | C Allele Carrier<br>(GC + CC) | SD change from<br>population<br>means in C<br>allele Carrier | P-value  |
|--------------------------|---------------------|-------------------------------|--------------------------------------------------------------|----------|
| BMI (Kg/m <sup>2</sup> ) | 26.2                | 28.9                          | 0.4                                                          | 1.10E-04 |
| WC (cm)                  | 86.4                | 89.4                          | 3.9                                                          | 3.48E-04 |
| WHR                      | 0.82                | 0.84                          | -0.009                                                       | 4.99E-04 |
| VAI                      | 2.1                 | 2.4                           | 0.1                                                          | 4.00E-02 |
| BAI                      | 25.3                | 26.4                          | 1.4                                                          | 3.30E-02 |

BMI; body mass index, WC; waist circumference, WHR; waist to hip ratio, VAI; visceral adiposity index, BAI; body adiposity indices,
